# Supplementary material for: Multi-categorical deep learning neural network to classify retinal images: A pilot study employing small database
Source: PubMed Central journal article supplement (PMC5667846; doi:10.1371/journal.pone.0187336), 2017-11-02
Supplement: pone.0187336.s001.pdf [file pone.0187336.s001.pdf]

# **Multi-categorical deep learning neural network to classify retinal images: A pilot study employing small database**

Running title: Multi-categorical Deep Learning with Retinal Images

Joon Yul Choi<sup>1</sup>, Tae Keun Yoo<sup>2\*</sup>, Jeong Gi Seo<sup>2</sup>, Jiyong Kwak<sup>2</sup>, Terry Taewoong Um<sup>3</sup>, Tyler Hyungtaek Rim<sup>2\*</sup>

<sup>1</sup>Department of Electrical and Computer Engineering, Seoul National University, Seoul, South Korea

<sup>2</sup>Institute of Vision Research, Department of Ophthalmology, Yonsei University College of Medicine, Seoul, South Korea

<sup>3</sup>Department of Electrical & Computer Engineering, University of Waterloo, Waterloo, Ontario, Canada

**Supporting Information File S1. Example of misclassification.**

|                                                                                     | <b>Ground truth</b> | <b>VGG19-TL-RF<br/>Classification result</b> |
|-------------------------------------------------------------------------------------|---------------------|----------------------------------------------|
| 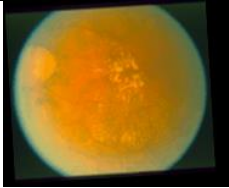   | <b>Wet AMD</b>      | <b>Dry AMD</b>                               |
|    | <b>RVO</b>          | <b>BDR</b>                                   |
|   | <b>Wet AMD</b>      | <b>BDR</b>                                   |
|  | <b>BDR</b>          | <b>Dry AMD</b>                               |
